# Supplementary material
Source: HighWire-hosted journal article supplement (https://bmjopen.bmj.com/content/14/7/e081645)
Supplement: inline-supplementary-material-1 [file inline-supplementary-material-1.pdf]

Appendix

Table 1A: Sources of data

| Data role  | Data                                                                                                               | Measurement level                  | Source within EPOCH                                                                                  | Comment                                                                                                         |
|------------|--------------------------------------------------------------------------------------------------------------------|------------------------------------|------------------------------------------------------------------------------------------------------|-----------------------------------------------------------------------------------------------------------------|
| Outcomes   | Clinical outcomes (mortality, clinical deterioration events, late ICU admissions, duration of hospital stay, etc.) | One outcome per patient            | Clinical trial outcomes database                                                                     | All 217,174 patients in the trial had these outcomes documented                                                 |
|            | Vital signs documentation                                                                                          | One value per patient              | Random selection of 5 patients each week for the 26 weeks of each study period at each site          | 8,282 patients were assessed for documentation of vital signs                                                   |
|            | Documentation and Interaction Survey                                                                               | One survey per nurse               | Nurses at enrolled hospitals                                                                         | All nurses were approached                                                                                      |
| Predictors | Patient to nurse ratio                                                                                             | One value per site per time period | Random selection of 5 patients each week for the 26 weeks of each of three study periods at 22 sites | The ratio was based on the average number of patients being cared for by nurses of the selected 8,282 patients. |
|            | Site-specific descriptors (Mean BP,Medical team,PM MD/Fellow,Transplant)                                           | One value per site per time period | Clinical trial site descriptors database                                                             | Mean BP could vary by study period. Other descriptors were constant                                             |

Table 2A: Vital Signs Monitoring sensitivity analysis (excluding site 21)

| Outcome                 | Univariable       |          | Multivariable     |          |
|-------------------------|-------------------|----------|-------------------|----------|
|                         | RR (95% CrI)      | Pr(RR<1) | RR (95% CrI)      | Pr(RR<1) |
| Heart Rate              | 0.98 [0.86, 1.13] | 60.4%    | 0.96 [0.83, 1.10] | 74.0%    |
| Respiratory Rate        | 1.01 [0.88, 1.17] | 43.3%    | 0.98 [0.83, 1.14] | 62.5%    |
| Systolic blood pressure | 1.01 [0.79, 1.31] | 45.6%    | 0.89 [0.71, 1.13] | 83.4%    |
| Oxygen saturation       | 1.06 [0.89, 1.27] | 25.7%    | 0.98 [0.81, 1.19] | 57.8%    |
| Capillary refill time   | 0.97 [0.17, 4.77] | 52.0%    | 0.27 [0.06, 1.18] | 95.8%    |
| Oxygen therapy          | 0.92 [0.73, 1.15] | 77.8%    | 0.89 [0.70, 1.14] | 81.8%    |
| Respiratory effort      | 1.04 [0.52, 2.32] | 45.6%    | 0.86 [0.34, 2.01] | 63.3%    |
| All of above collected  | 1.11 [0.76, 1.62] | 28.9%    | 0.78 [0.57, 1.07] | 94.1%    |
| Temperature             | 0.99 [0.89, 1.09] | 60.3%    | 1.00 [0.89, 1.13] | 51.3%    |

Vital signs monitoring -random effects negative binomial models. Estimates are rate ratios (RR) for the relative change in the rate of documentation with one additional patient per nurse, 95% CrIs and P(RR < 1), the probability that the rate of documentation is reduced with an increasing patient-nurse ratio.
