# Supplementary material
Source: HighWire-hosted journal article supplement (https://bmjopen.bmj.com/content/14/7/e081645)

**Supplementary figure 2A:** nurse perceptions of quality of care (sensitivity analysis, excluding site 21)

**Figure 2A:** Distributions of DIS responses for communication quality (9-point scale), apprehension (9-point scale), timely care (5-point scale) and influence care (9-point scale) from nurses, where higher scores are better perceptions. The responses are grouped according to whether they were collected from a site-period with a nurse -patient ratio in the lowest quartile, middle two quartiles, or highest quartile. The 5 point scale was coded so that 5 was “best”, 3 was “middle” and 1 was “worst” (with 4 mapping onto 7, and 2 mapping onto 3 on the 9-point scale). As the ratio increases, there are proportionally more orange bar segments (worse perceptions) and fewer blues ones (better perceptions).

Legend: DIS=Documentation and Interaction Survey

# DIS Survey Responses by Patient–Nurse ratio

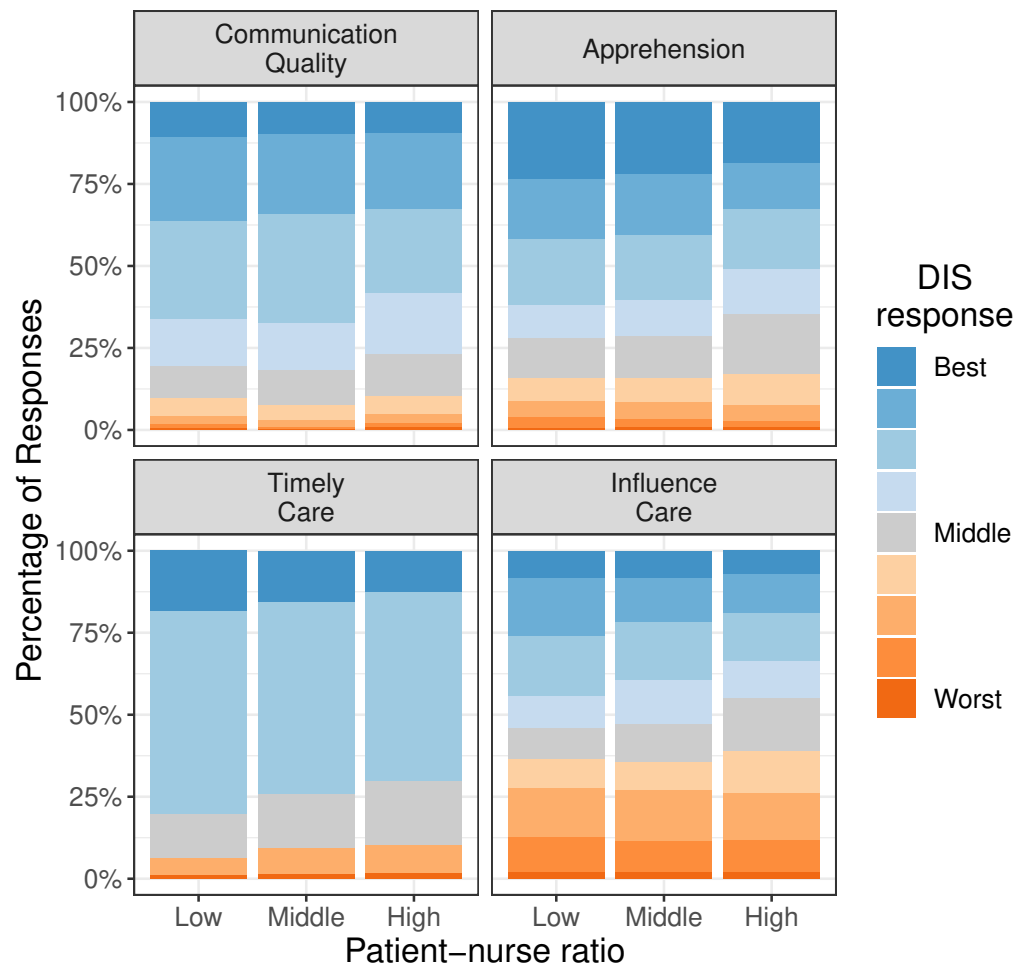

Supplement: inline-supplementary-material-3 [file inline-supplementary-material-3.pdf]
